# Supplementary material
Source: PubMed Central journal article supplement (PMC9564152)

ONLINE SUPPLEMENTAL MATERIAL

**Type 1 diabetic patient hematopoietic stem cells are programmed to generate increased peripheral helper and follicular helper T cells and increased autoimmunity-associated B cell subsets**

Andrea Vecchione\*<sup>1,2</sup>, Rachel Madley<sup>1</sup>, Nichole Danzl<sup>1</sup>, Chiara Borsotti<sup>1</sup>, Mohsen Khosravi Marharlooei<sup>1</sup>, Hao-Wei Li<sup>1</sup>, Grace Nauman<sup>1,3</sup>, Xiaolan Ding<sup>1</sup>, Siu-Hong Ho<sup>4</sup>, Georgia Fousteri<sup>2</sup>, Megan Sykes<sup>1,3,5</sup>

<sup>1</sup> Columbia Center for Translational Immunology, Department of Medicine, Columbia University Medical Center, Columbia University, New York, New York, USA.

<sup>2</sup> San Raffaele Hospital, Milan, Italy.

<sup>3</sup> Department of Microbiology and Immunology, Columbia University Medical Center, Columbia University, New York, New York, USA.

<sup>4</sup> Cytex Biosciences

<sup>5</sup> Department of Surgery, Columbia University Medical Center, Columbia University, New York, New York, USA.

**Animals**

NSG-pct recipients were used in these studies because we have observed that the porcine cytokine transgenes enhance human hematopoiesis from adult bone marrow HSCs in NSG mice (N.Danzl and M.Sykes, unpublished data). All mice were maintained under specific pathogen-free and helicobacter/pasteruella pneumotropica-free conditions, and all experiments were performed under approved protocols from the Columbia University Institutional Animal Care and Use Committee.

**Human tissue procurement and transplantation**

Human fetal thymus and liver tissues (gestational age 17 to 20 weeks) were obtained from Advanced Biosciences Resources. Fetal thymus fragments were cryopreserved in 10% dimethyl sulfoxide (Sigma-

Aldrich) and 90% human AB serum (Gemini Bio Products). T1D and HC donors were recruited by the Center for Translational Immunology Human Studies Core and the Naomi Berrie Diabetes Center and bone marrow was aspirated using standard sterile technique. All human samples were collected under protocols approved by the Institutional Review Board of Columbia University Medical Center in accordance with the Declaration of Helsinki.

### **Flow Cytometry**

Single-cell suspensions of spleen were treated with ACK lysis buffer (Life Technologies) to remove erythrocytes. After ACK lysis, remaining cells were passed through a 40µm filter prior to flow cytometry analysis. The following antibodies from BM Biosciences, eBioscience or BioLegend were used for flow cytometry: ICOS (ISA-3), CD45RA (HI100), CCR7 (G043H7), PD-1 (EH12.2H7), CXCR5 (RF8B2), CD8 (RPA-T8), CD25 (2A3), CD3 (SK7), CD4 (RPA-T4), CXCR3 (1C6), CD127 (A019D5), CCR2 (1D9), CCR5 (2D7), CD20 (L27), CD19 (HIB19), IgM (G20-127), IgG (G18-145), IgA (IS11-8E10), IgD (IA6-2), CD27 (O323), CD38 (HIT2), CD138 (MI15), CD11c (B-ly6), CD14 (M5E2), CD21 (Bu32), hCD45 (HI30) and mCD45 (30-F11). For intracellular staining, single-cell splenocyte suspensions were fixed-permeabilized with the FOXP3 Fixation Kit (Invitrogen) for 45 minutes at RT, then, stained with mAbs for FOXP3 (1054C), CTLA-4 (BNI3), IL-21 (3A3-N2.1), BCL-6 (K112-91) and Blimp-1 (646702) for 30 minutes at RT in permeabilization buffer. To determine IL-21 secretion, single-cell suspensions were stimulated for 3 hours with 50 ng/ml phorbol myristic acid (PMA; Sigma-Aldrich, St Louis, MO, USA), 1 µg/ml ionomycin (Sigma-Aldrich) and 3 µg/ml brefeldin A in RPMI supplemented with 10% FBS, 1% Heps (Sigma-Aldrich), 1% penicillin-streptomycin (Life Technologies), and 0.05% gentamicin (Life Technologies) in 37°C, 5% CO<sub>2</sub> incubator conditions. After washing, cells were acquired on Aurora Cytex (Fremont, California) and analyzed with FlowJo (Tree Star, USA) software.

### **ELISA of IgM and IgG concentration**

To quantify human antibody levels in serum of PI mice. Briefly, plates (Corning Inc.) were coated with unlabeled goat anti-human IgG Fc fragment (Jackson) or goat anti-human IgM (Southern Biotech) antibody. After washing and blocking the wells with 2% Bovine Serum Albumin (BSA, Fisher Scientific), samples were added at multiple dilutions. After washing, bound human Ig was detected using biotin-conjugated mouse anti-human IgG secondary antibody (BD Pharmingen) or biotin-conjugated mouse anti-human IgM secondary antibody (BD Pharmingen), followed by streptavidin-horseradish peroxidase (Thermo Scientific). Colorimetric change was developed with a 3,3',5,5'-Tetramethylbenzidine substrate solution (Thermo Scientific), stopped by the addition of 2M sulfuric acid (Sigma), and the optical density was determined using a spectrophotometer at 450nm absorbance. A standard curve based on human serum with known IgM and IgG concentrations (Bethyl) was used to calculate sample Ig concentrations.

### **Information Relative to Supplementary Figures**

**Supplementary Figure 1. Detection and analysis of CXCR5<sup>-</sup>PD1<sup>+</sup> Tph-like and CXCR5<sup>+</sup>PD1<sup>+</sup> Tfh cells in PI mice.** Gating strategy for CD45RA<sup>+</sup>CCR7<sup>+</sup> CD4<sup>+</sup> naïve T cells, and Tph-like and Tfh cells.

**Supplementary Figure 2. CXCR5<sup>-</sup>PD-1<sup>+</sup> Tph-like and CXCR5<sup>+</sup>PD-1<sup>+</sup> Tfh cells share features associated with B cell helper function.** (A) Representative plot of naïve CD45RA<sup>+</sup>CCR7<sup>+</sup> T cells, and Tph-like and Tfh cells among gated memory CD4<sup>+</sup> T cells from 3 independent experiments ( $n = 11$  HC and  $n = 5$ ). The expression of (B) ICOS, (C) CXCR3 and (D) CCR2 is shown. \* $p < 0.05$ , \*\* $p < 0.01$  and \*\*\* $p < 0.001$  comparing Tph-like (CXCR5<sup>-</sup>PD-1<sup>+</sup>) and Tfh cells (CXCR5<sup>+</sup>PD-1<sup>+</sup>) to naïve CD4<sup>+</sup> T cells.; Friedman's multiple comparison test was used for statistical analysis.

**Supplementary Figure 3. Analysis of Tfh and Tph-like.** A) histogram of PD-1 and ICOS relative expression between CD45RA<sup>+</sup> and CD45RA<sup>-</sup> CD4<sup>+</sup> T cells from spleens of PI mice. (B) Correlation between Tph-like and Tfh cells frequencies. Data are represented as mean  $\pm$  SEM. \* $p < 0.05$ , \*\* $p < 0.01$  and \*\*\* $p < 0.001$  Friedman's multiple comparison test was used for statistical analysis.

**Supplementary Figure 4. Detection and analysis of B cell subsets in PI mice.** Gating strategy for naïve CD27<sup>-</sup>IgD<sup>+</sup>, memory CD27<sup>+</sup>IgD<sup>-</sup>, unswitched CD27<sup>+</sup>IgD<sup>+</sup> and unconventional memory CD27<sup>-</sup>IgD<sup>-</sup> B cells, and CD19<sup>+</sup>CD20<sup>-</sup> ASCs.

Supplementary Table 1: Donor list with relative HLA type

|      |              | Gene Locus   |             |             |             |             |              |             |              |
|------|--------------|--------------|-------------|-------------|-------------|-------------|--------------|-------------|--------------|
|      |              | HLA-A        |             | HLA-B       |             | HLA-DRB     |              | HLA-DQB     |              |
|      |              | Allele 1     | Allele 2    | Allele 1    | Allele 2    | Allele 1    | Allele 2     | Allele 1    | Allele 2     |
| Exp1 | T1D          | 01 (A1)      | 02 (A2)     | ---         | ---         | 03 (DR3)    | unkn         | unkn        | unkn         |
|      | Fetal Thymus | unkn         | 02 (A2)     | ---         | ---         | 03 (DR3)    | unkn         | unkn        | unkn         |
| Exp2 | HC           | 02 (A*02)    | 29 (A29)    | 44 (B44)    | 61 (B61)    | 04 (DR4)    | unkn         | 03:02 (DQ8) | 02:01 (DQ2)  |
|      | Fetal Thymus | 02 (A*02)    | 24 (A24)    | ---         | ---         | 04 (DR4)    | unkn         | 03:02 (DQ8) | unkn         |
| Exp3 | HC           | 02:01 (A*02) | 23:01 (A23) | 15:01 (B15) | unkn        | 04:04 (DR4) | 07:01 (DR7)  | 03:02 (DQ8) | 06 (DQ6)     |
|      | Fetal Thymus | 02:01 (A*02) | 31:01 (A31) | 07:02 (B7)  | 40:02 (B40) | 04:04 (DR4) | 14:02 (DR14) | 03:02 (DQ8) | 05:01 (DQ4)  |
| Exp4 | HC           | unkn         | unkn        | ---         | ---         | 04 (DR4)    | unkn         | 03:02 (DQ8) | unkn         |
|      | T1D          | 02 (A*02)    | 02 (A*02)   | ---         | ---         | 04 (DR4)    | unkn         | 03:02 (DQ8) | 03:02 (DQ8)  |
|      | Fetal Thymus | 02 (A*02)    | 24 (A24)    | ---         | ---         | 04 (DR4)    | unkn         | 03:02 (DQ8) | 4:02         |
| Exp5 | HC BM        | 02:07        | 11:02       | 13:01       | 27:04       | 12:02       | 12:02        | 03:01       | 03:01        |
|      | T1D BM       | 24:02        | 30:02       | 15:03       | 18:01       | 03:01       | 03:01        | 02:01       | 02:01        |
|      | Fetal Thymus | 02 (A*02)    | 30:04 (A30) | 58:02 (B58) | 35:01 (B35) | 15:03 (B15) | 03:01 (DR3)  | 03:01       | 06:02 (DQ06) |

# Supplementary Figure 1

## A Gating Strategy for CXCR5-PD-1+ Tph and CXCR5+PD-1+ Tfh cells

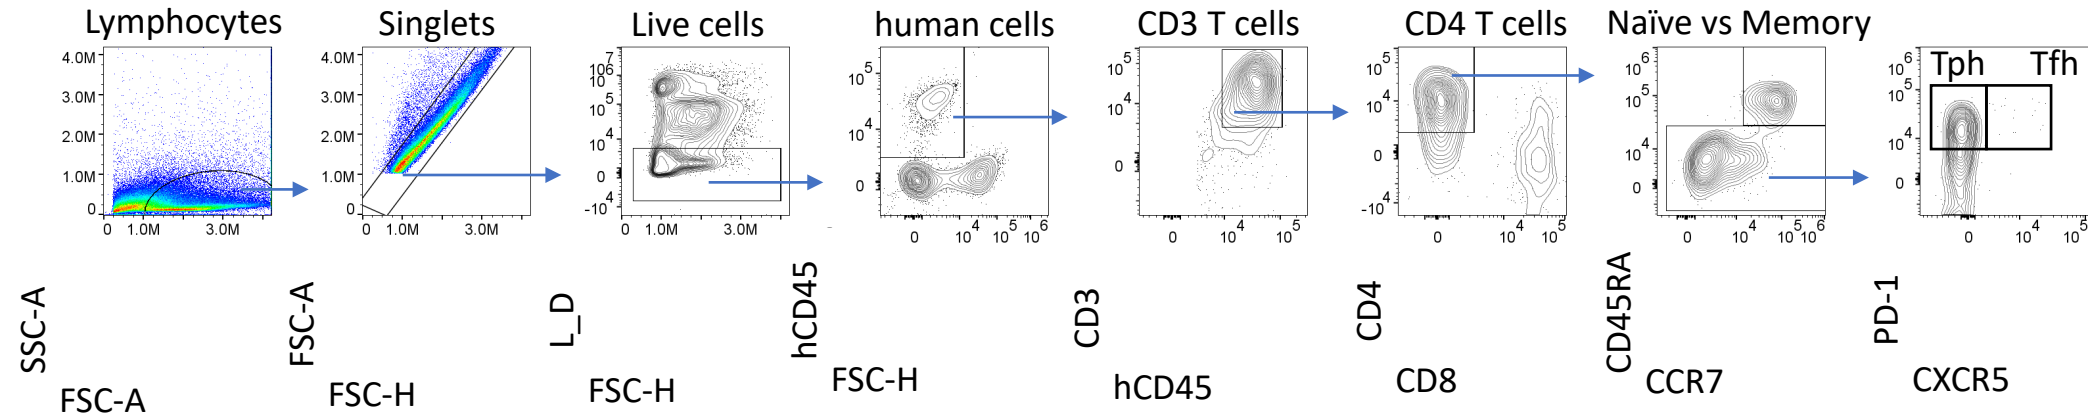

# Supplementary Figure 2

A

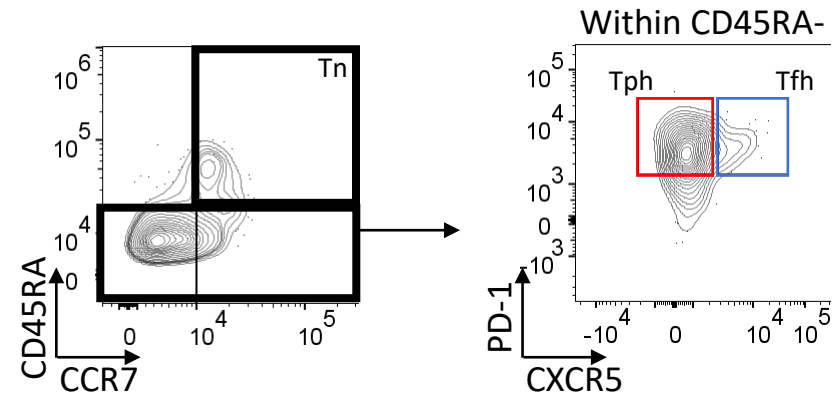

B

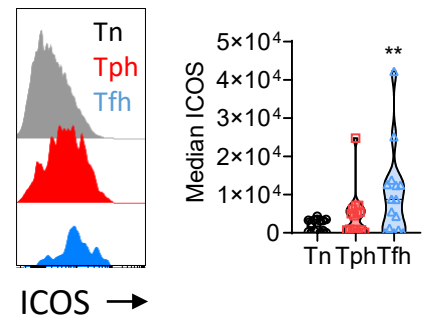

C

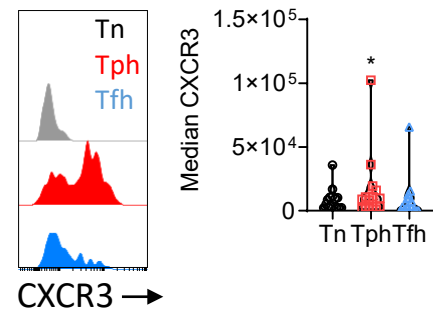

D

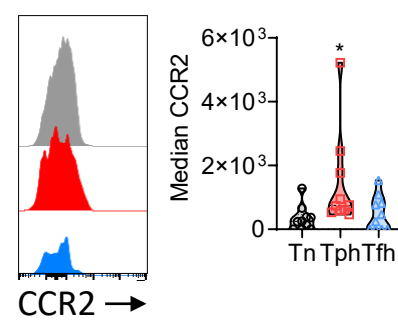

# Supplementary Figure 3

## A

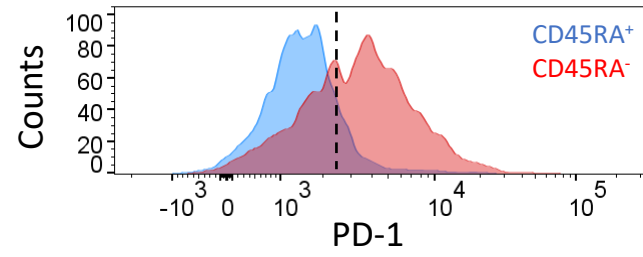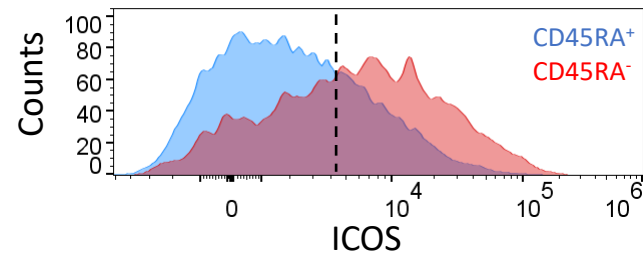

## B

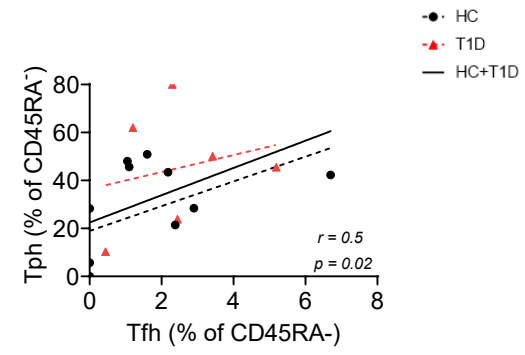



# Supplementary Figure 4

A

Gating Strategy for B cells subsets

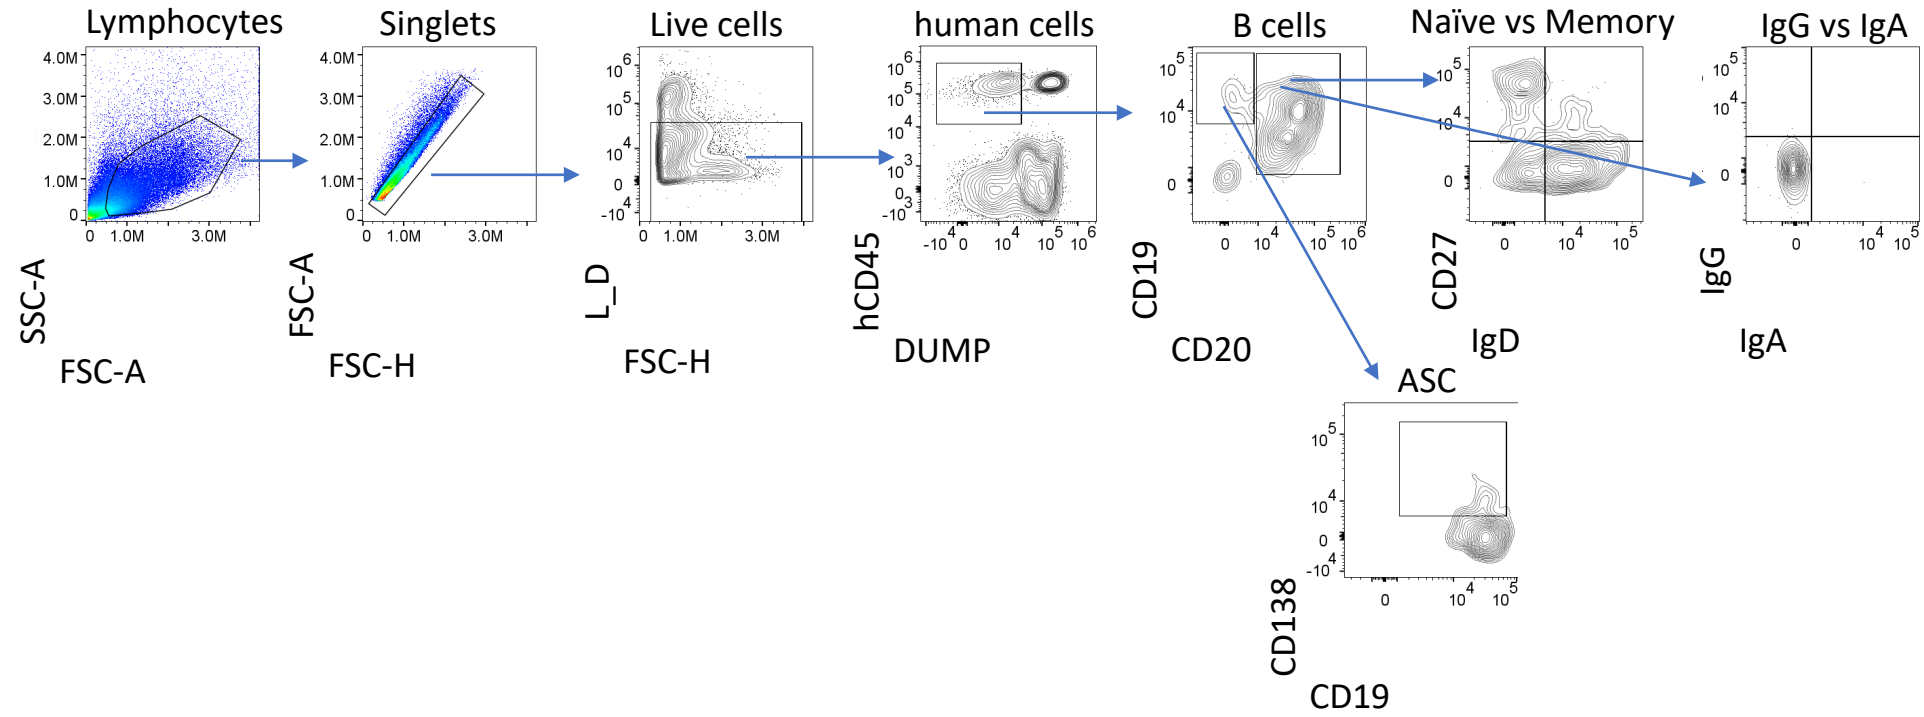

Supplement: NIHMS1835760-supplement-1.pdf [file NIHMS1835760-supplement-1.pdf]
